# Supplementary material
Source: Springer Nature journal article supplement (https://www.springermedizin.de/resource/supplementary/13256_2011_1993_MOESM2_ESM.pdf/9649204)

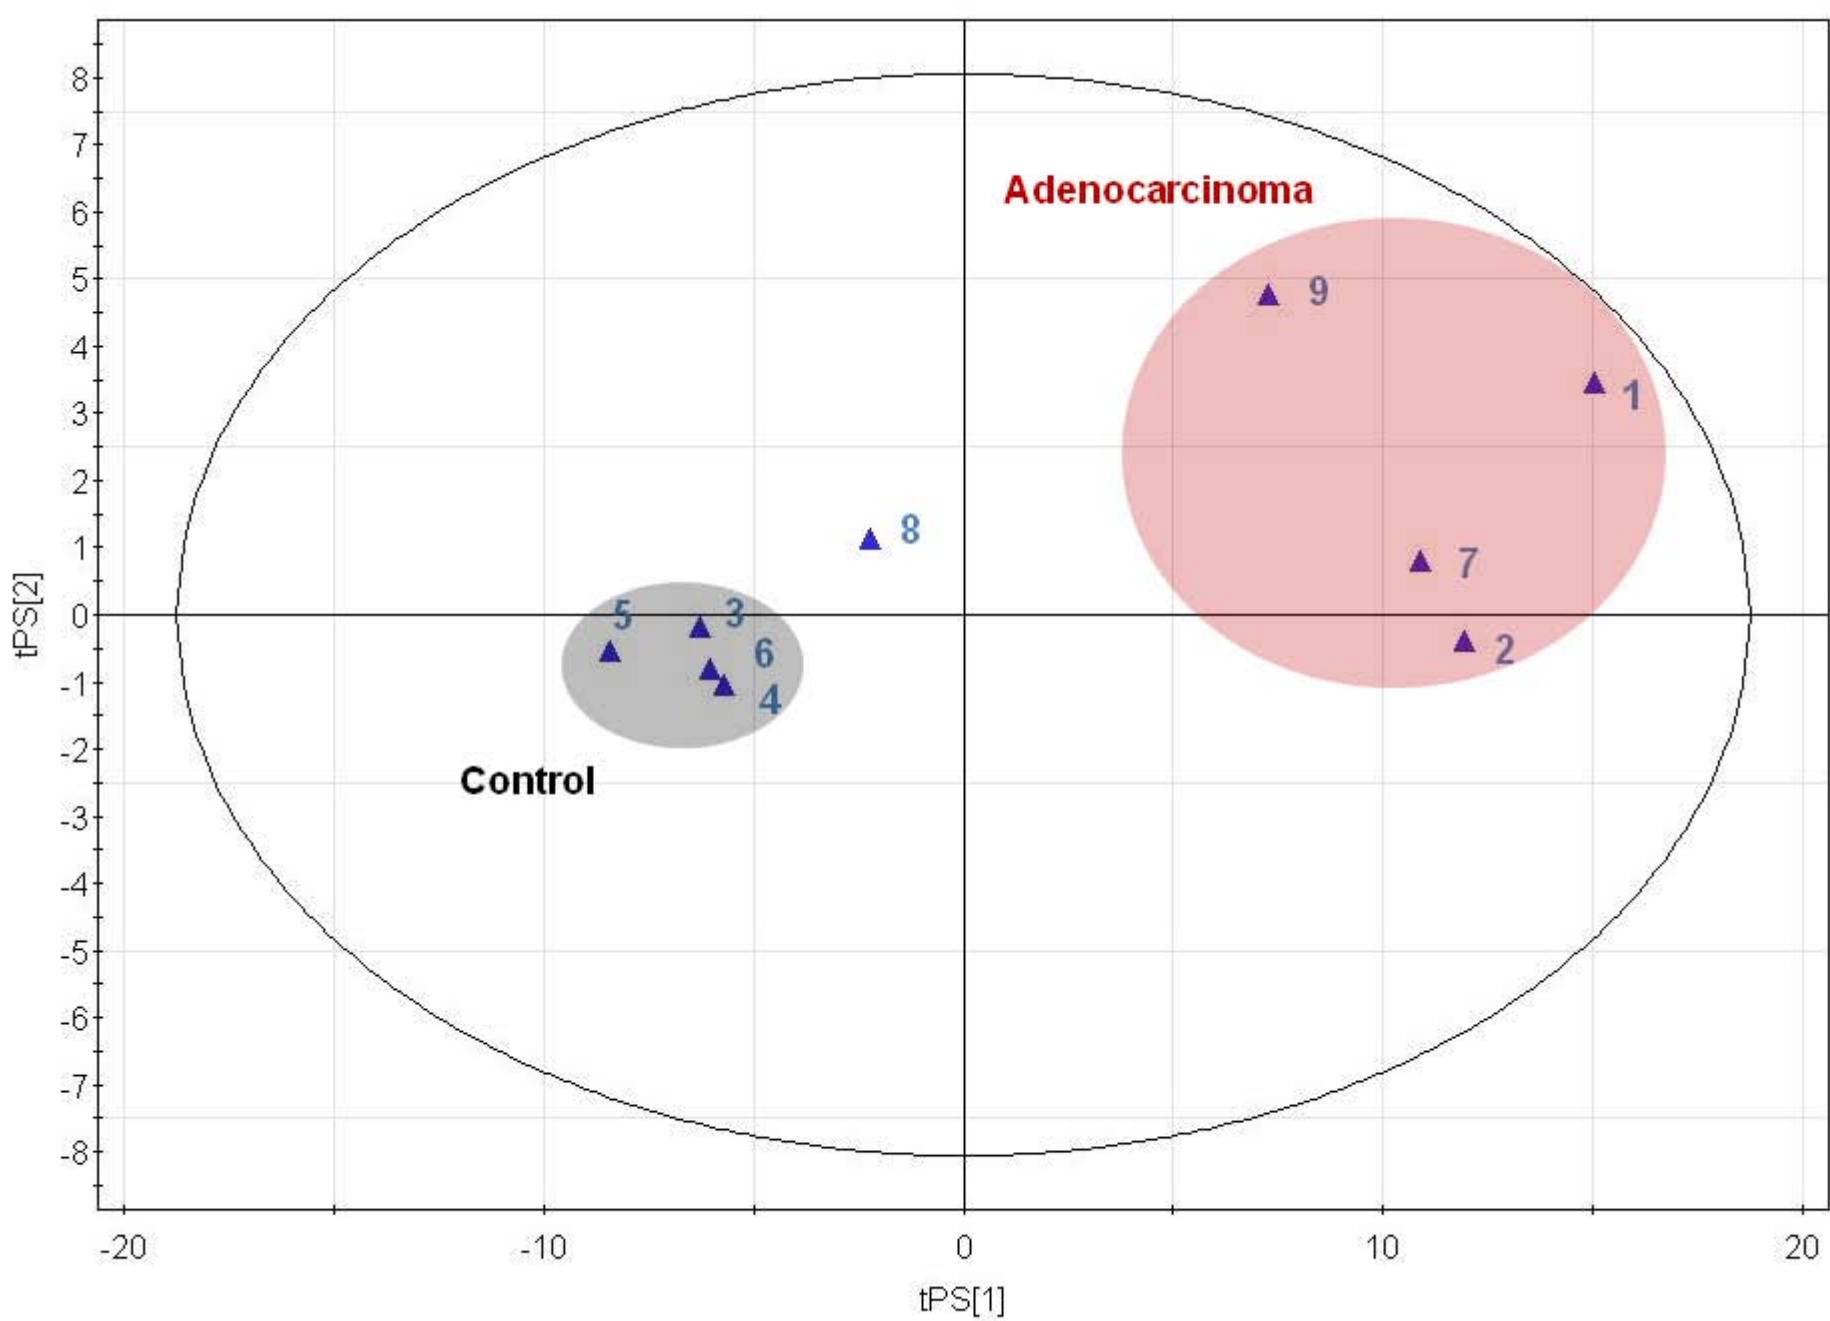

Supplement: MOESM2 [file 9649204]
